## RESEARCH ARTICLE

# The role of attractive and repellent scene memories in ant homing (*Myrmecia croslandi*)

Trevor Murray<sup>1,‡</sup>, Zoltán Kócsi<sup>1</sup>, Hansjürgen Dahmen<sup>2</sup>, Ajay Narendra<sup>3</sup>, Florent Le Möel<sup>4</sup>, Antoine Wystrach<sup>4,\*</sup> and Jochen Zeil<sup>1,\*</sup>

## ABSTRACT

Solitary foraging ants rely on vision when travelling along routes and when pinpointing their nest. We tethered foragers of *Myrmecia croslandi* on a trackball and recorded their intended movements when the trackball was located on their normal foraging corridor (on-route), above their nest and at a location several metres away where they have never been before (off-route). We found that at on- and off-route locations, most ants walk in the nest or foraging direction and continue to do so for tens of metres in a straight line. In contrast, above the nest, ants walk in random directions and change walking direction frequently. In addition, the walking direction of ants above the nest oscillates on a fine scale, reflecting search movements that are absent from the paths of ants at the other locations. An agent-based simulation shows that the behaviour of ants at all three locations can be explained by the integration of attractive and repellent views directed towards or away from the nest, respectively. Ants are likely to acquire such views via systematic scanning movements during their learning walks. The model predicts that ants placed in a completely unfamiliar environment should behave as if at the nest, which our subsequent experiments confirmed. We conclude first, that the ants' behaviour at release sites is exclusively driven by what they currently see and not by information on expected outcomes of their behaviour; and second, that navigating ants might continuously integrate attractive and repellent visual memories. We discuss the benefits of such a procedure.

**KEY WORDS:** Visual navigation, Ants, Attractive and repellent memories, Homing, Route following, *Myrmecia croslandi*

## INTRODUCTION

Navigation on a local scale, in contrast to that on a global scale, involves travelling along memorized routes and pinpointing places (e.g. Zeil, 2012). Much evidence has accumulated to show that ants form visual memories of how the scene looks along routes (e.g. Wehner et al., 1996; Wystrach et al., 2011a,b; Mangan and Webb, 2012) and that alignment matching (Zeil et al., 2003; Collett et al., 2013) between memorized and currently experienced views

provides robust information on heading direction (Graham and Cheng, 2009; Baddeley et al., 2011, 2012; Narendra et al., 2013; Zeil et al., 2014). Heading direction can be recovered, even from locations at some distance from familiar locations, by detecting the minimum of the rotational image difference function (rotIDF) resulting from a comparison between current and memorized views (Zeil et al., 2003; Stürzl and Zeil, 2007; Philippides et al., 2011; Narendra et al., 2013; Stürzl et al., 2015). This minimum provides a measure of familiarity in addition to a heading direction (Baddeley et al., 2011, 2012; Graham et al., 2010).

Before becoming foragers, ants perform a series of learning walks around the nest during which they alternate between turning to look in the nest direction (Müller and Wehner, 2010; Fleischmann et al., 2016, 2017, 2018a,b) and in directions away from the nest from different compass directions (Jayatilaka et al., 2018; reviewed in Zeil and Fleischmann, 2019). It is attractive to assume that the ants store snapshots during these turns whenever they are aligned parallel to the home vector – that is, when they are facing toward or away from the nest (Müller and Wehner, 2010; Graham et al., 2010; Jayatilaka et al., 2018) – as this is theoretically sufficient for returning ants to align with and walk in the direction of the most familiar of nest-directed snapshots in order to pinpoint the nest (Graham et al., 2010; Baddeley et al., 2012; Wystrach et al., 2013a).

Such visual alignment matching (Collett et al., 2013) explains well how ants recover the correct direction when on their familiar route (Wystrach et al., 2011a,b, 2012; Baddeley et al., 2012; Kodzhabashev and Mangan, 2015). Moreover, nest-directed views acquired during learning walks (reviewed in Collett and Zeil, 2018; Zeil and Fleischmann, 2019) can also provide guidance from locations that are unfamiliar to ants and that can be 10–15 m away from the nest in open forest habitats (Narendra et al., 2013; Stürzl et al., 2015), although the initial movements of released ants may not be directed toward the nest (Zeil et al., 2014), but toward a familiar route (Collett et al., 2007; Wystrach et al., 2012).

Overall, this line of work has led to the suggestion that visually navigating insects would only need 'procedural knowledge' about where to go rather than a more sophisticated representation of their spatial environment that would allow them 'to know where they are' (Collett et al., 2002; Wehner et al., 2006; Cheung et al., 2014; Graham and Philippides, 2017).

To test this directly, we positioned ants that we had tethered over a trackball at different locations in their natural foraging environment, including above their nest, and recorded their intended direction and distance of movement. Ants mounted on the ball were well oriented towards the nest at both on- and off-route locations, but displayed a search pattern when above the nest, as if they knew they were at the nest, implying a sort of positional rather than just procedural knowledge. Using a simple agent-based simulation we show, however, that these results can be more parsimoniously explained by alignment matching involving continuous integration of

<sup>1</sup>Research School of Biology, Australian National University, Canberra, ACT 2601, Australia. <sup>2</sup>Cognitive Neuroscience, University of Tübingen, 72074 Tübingen, Germany. <sup>3</sup>Department of Biological Sciences, Macquarie University, Sydney, NSW 2109, Australia. <sup>4</sup>Research Center on Animal Cognition, University Paul Sabatier/CNRS, 31062 Toulouse, France.

\*Co-last authors

‡Author for correspondence (trevor.murray@anu.edu.au)

© T.M., 0000-0002-5713-9797; Z.K., 0000-0001-8637-1619; H.D., 0000-0002-1183-7872; A.N., 0000-0002-1286-5373; F.L.M., 0000-0003-4780-0083; A.W., 0000-0002-3273-7483; J.Z., 0000-0003-1822-6107

attractive and repellent visual memories, acquired when facing, respectively, towards and away from the nest during learning walks.

## MATERIALS AND METHODS

### Ants and experimental site

We worked with foragers of the Australian jack jumper ant *Myrmecia croslandi* Taylor 1991 from a nest in the Australian National University's campus field station ( $-35^{\circ}16'49.87''\text{S}$  and  $149^{\circ}06'43.74''\text{E}$ ). The ants are day-active, visually navigating solitary foragers that hunt for insects on the ground at up to 4 m distance from the nest and on trees about 12 m away from the nest where they also feed on sugar secretions of plant-sucking insects (see Fig. 2A, centre). For details of the foraging ecology and the navigational abilities of these ants, see Jayatilaka et al. (2011, 2014), Narendra et al. (2013) and Zeil et al. (2014). During February to March 2017 and December 2017 to March 2018, between 09:00 h and 15:00 h, we caught foraging ants either at their foraging trees about 12 m from the nest in a 'full-vector' state (FV,  $n=10$ ) or at the nest in a 'zero-vector' state (ZV,  $n=18$ ), offered them sugar water solution to feed on, before immobilizing them on ice for up to 15 min and tethering them to a metal pin by their mesonotum (thorax) using Bondic liquid plastic welder (Biochem Solutions, Ellerslie, New Zealand). The ants were placed on an air-cushioned light-weight, 5 cm diameter track ball (Fig. 1A) on which they were free to rotate around the yaw axis but that allowed us to record their intended translational movements as described in detail by Dahmen et al. (2017). We placed the trackball contraption with a tethered ant at each of three locations in a random order (Fig. 2 A, centre): 6.5 m west of the nest where none of the ants were likely to have been before (off-route); 6.5 m south of the nest, half-way along their normal foraging route towards trees (on-route); and directly above the nest (nest).

We recorded the intended movement directions and distances on the trackball at each displacement for up to 10 min, before shifting the track ball contraption together with the tethered ant to the next location. Ants were carefully un-tethered and released close to the nest following the three displacements.

To demonstrate the foraging patterns of ants at this nest and the full range of learning walks, we show the paths of foraging ants, ants that performed learning walks and ants that were released after contributing to unrelated experiments that were recorded with differential GPS (DGPS) over 2 years (Fig. 2A, centre; Fig. S1; for details, see Narendra et al., 2013). In brief, coloured flag pins were placed on the ground approximately 20 cm behind a walking ant at fairly regular intervals, carefully avoiding disturbing her progress. The resulting pin trail was subsequently followed with the rover antenna of a DGPS system, recording the position with an accuracy of better than 10 cm.

Requests for further information and for original data should be directed to the corresponding author (T.M.).

### Data analysis

We recorded trackball rotations due to the intended translation of the ants at 275 frames  $\text{s}^{-1}$ , which reflect the direction and speed of the ants' intended movements. We present the reconstructed paths, final bearings, changes in walking direction and path lengths for the first 5 min of recordings at the three displacement locations. With the exception of one ant at the off-route location, all ants reached this criterion. We used the Matlab (MathWorks, Natick, MA, USA) circular statistics toolbox (by Philipp Berens) to perform Rayleigh's test for non-uniformity on directional data and Wilcoxon rank sum tests on differences between displacement locations using the

ranksum function in Matlab. For comparisons between all three locations, we applied a Bonferroni correction with a resulting critical value for individual tests of  $P=0.0167$ .

### Agent-based modelling

#### Reconstructed world and ant views

We rendered panoramic views within a 3D model of the ants' natural environment that was previously reconstructed at the ANU Campus Field Station using a laser scanner and camera-based methods (Stürzl et al., 2015). We down-sampled the rendered views to  $360 \times 180$  pixels; that is, 1 deg per pixel resolution to roughly match the resolution of the ants' compound eyes. Note that the 3D model was obtained 3 years before the treadmill experiments were conducted, so there will be some changes to the landmark panorama, in particular involving the canopy, while all the major geometric relationships of dominant visual features such as trees will have remained the same.

#### Memorized views and current familiarity

The simulated ant (agent) is assumed to have stored a collection of memorized views around the nest during learning walks and along its normal foraging route (Fig. 1B). During tests, the agent computes a value of visual familiarity at each time step by comparing the current view with its memory bank. This is achieved by calculating the global root mean squared pixel difference (Zeil et al., 2003) between the current view and each of the views in the memory bank, and keeping the value of the lowest mismatch, as is typically done in models and studies of ant navigation (Wystrach et al., 2011a,b, 2012; Baddeley et al., 2011, 2012; Philippides et al., 2011; Narendra et al., 2013; Zeil et al., 2014; Stürzl et al., 2015). Because high mismatch values indicate a large discrepancy between the current and a memorized view, the value indicates the current unfamiliarity score rather than a familiarity score. Note that in the insect brain, the activity of the mushroom body output neurons (MBON) also correlate with unfamiliarity rather than familiarity (Owald et al., 2015; Felsenberg et al., 2018). Importantly, views in this model are not rotated, but compared only at the facing direction of the current and memorized views. That is, the agent does not need to stop and scan because only one view is compared for each step.

#### Combining attractive and repellent visual memories

The novel aspect of the current model is that the agent is assumed to have two independent memory banks (Fig. 1B–D): one containing attractive views and one containing repellent views. Both memory banks contain views experienced during learning and foraging walks; the attractive memory bank contains views that are assumed to have been memorized when the ants were oriented toward the nest and the repellent memory bank contains those that have been memorized while looking away from the nest. This is motivated by the very regular scanning movements of ants during their learning walks where they alternate looking towards the nest and away from the nest direction (Jayatilaka et al., 2018; Zeil and Fleischmann, 2019). For simplicity, learning walk views were assumed to have been acquired within a 1 m radius around the nest and we chose a 10 m long route, corresponding roughly with the foraging corridor of this particular nest (see Fig. 2A, centre). Both nest-directed (attractive) learning walk views and views away from the nest (repellent) were taken from positions along a spiral rather than a circle around the nest (Fig. 1B), to mimic the fact that successive learning walk loops reach increasing distances from the nest (e.g. Fleischmann et al., 2016; Jayatilaka et al., 2018) and to ensure that results at the nest were not dependent on having views memorized at

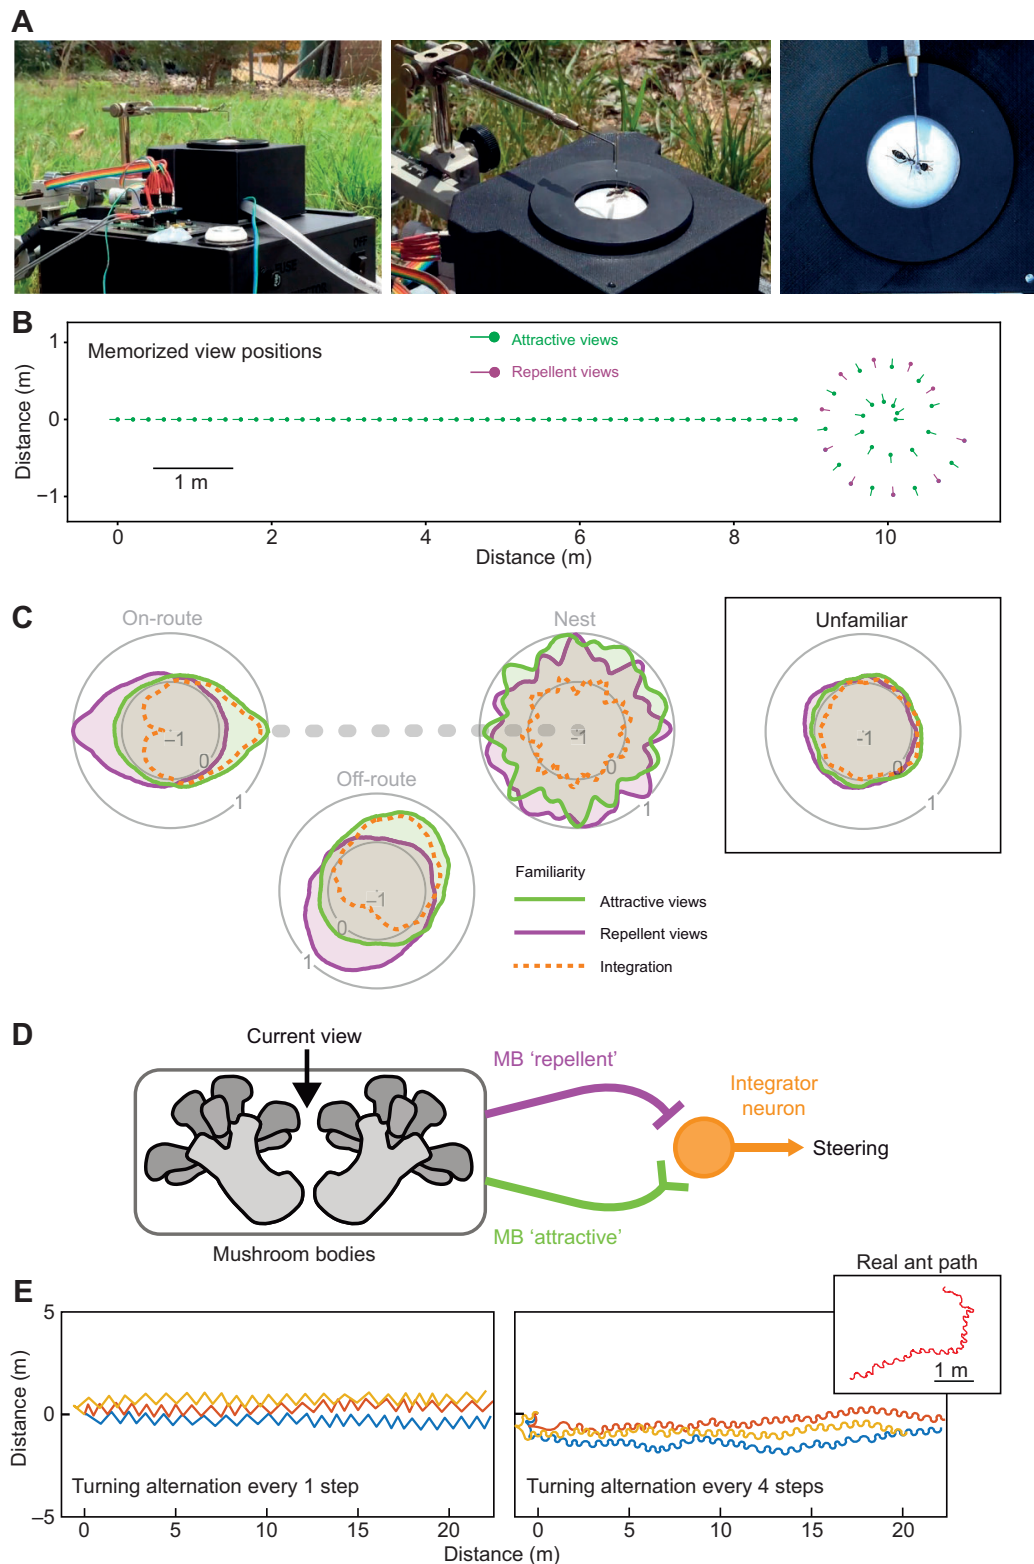

**Fig. 1. Experimental set-up and agent-based modelling.** (A) Three views of the air-cushioned trackball contraption and the tethered ant. (B) Schematic map of the attractive and repellent memorized views along the foraging route and around the nest that constituted the attractive and repellent memory bank. (C) Schematic distribution of familiarity (0=unfamiliar; 1=familiar) for attractive and repellent views at the four release locations and the result of their integration (+1=attractive; 0=neutral; -1=repellent). Note that, after integration (orange dash-line), distributions at the nest and at the completely unfamiliar site are neutral for different reasons: views at the nest are familiar for both attractive and repellent pathways, which cancel each other; while views at the completely unfamiliar site are unfamiliar for both pathways. (D) A 'neuro-schematic' summary of the model comparing a current view with a repellent and an attractive view memory bank (MB), and the integration of the output providing a steering command. (E) The paths generated by the simulation reproduce the details of real ant paths better when the regular alternation of path direction is implemented every 4th step, rather than at each successive step (as was done in the present study); however, this has no impact on the model's overall trajectory.

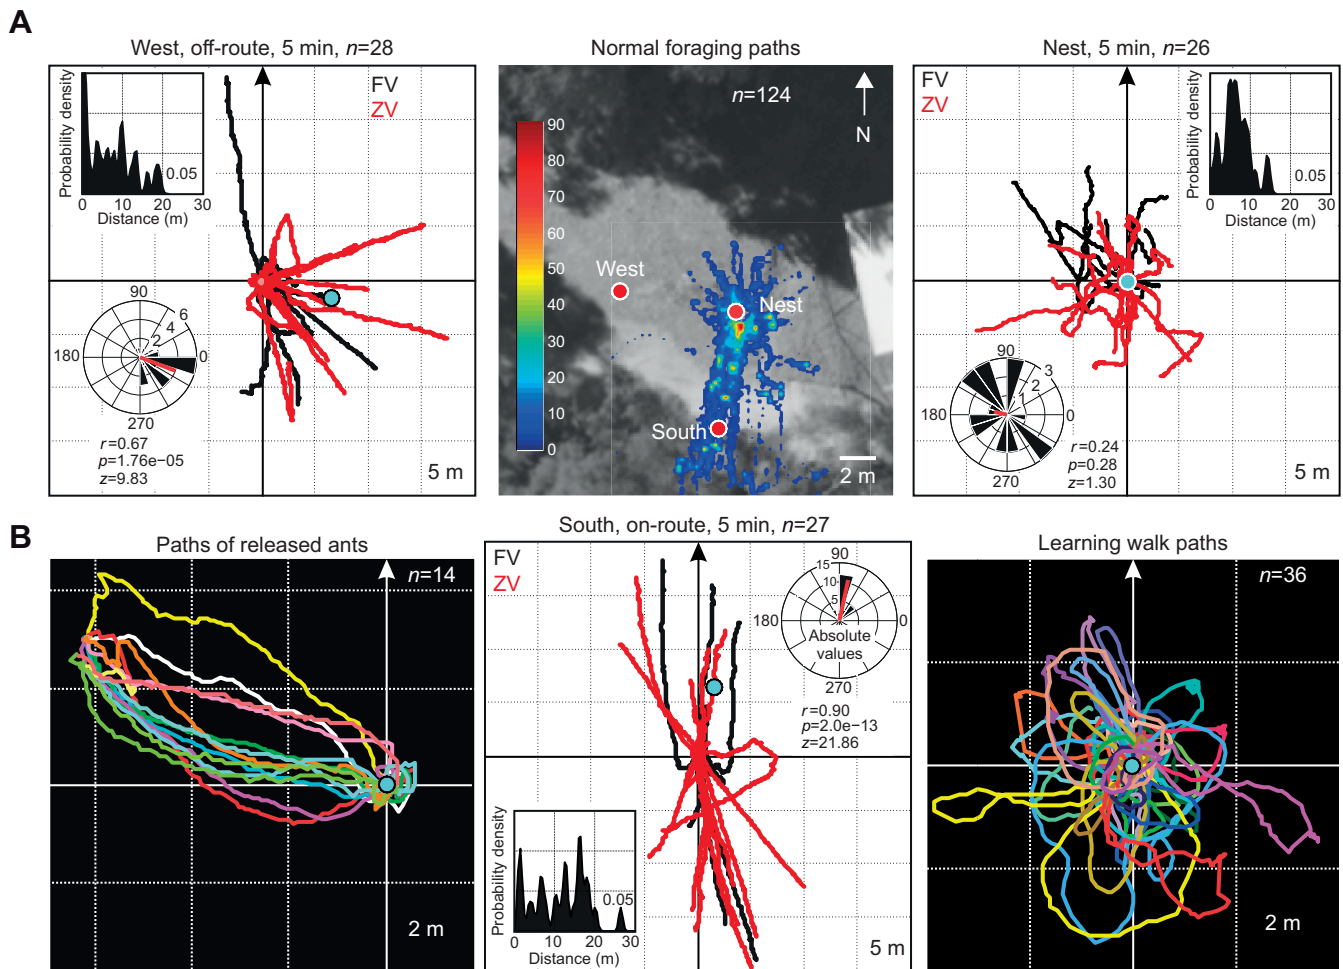

**Fig. 2. The behaviour of tethered ants at three locations in their natural foraging environment.** (A) Aerial photograph (centre) of the nest area, with off-route, nest and on-route locations marked by red circles. False colour-coded area shows the 2D probability density of 124 outward going paths of foraging ants that operated from this nest and were tracked with differential GPS (DGPS) over a period of 2 years. See colour bar for scale and Fig. S1 for individual paths. Intended paths of tethered ants are shown for the off-route location (A, left), the nest location (A, right) and the on-route location (B, centre), with the paths of zero-vector (ZV) ants shown in red and those of full-vector (FV) ants in black. The nest location is indicated by a blue circle. Insets show for both FV and ZV ants the probability density of virtual distances from the starting point reached after 5 min and circular histograms of final bearings with the red line indicating the length and direction of the mean vector;  $r$ , resulting vector length;  $p$ , probability of rejecting hypothesis of uniform distribution;  $z$ : z-statistic of Rayleigh test of uniformity. (B) Left: paths of 14 ants released just north of the off-route location and tracked with DGPS. Right: learning walk paths of ants around the nest, recorded with DGPS.

the exact same distance from the nest. We also included in the attractive memory bank views that foragers experience when travelling back to the nest along their normal foraging corridor (Fig. 1B).

### Modelling procedure

At each time step, the agent computes two values of unfamiliarity: one by comparing the current view with the attractive memory bank and one by comparing the same current view with the repellent memory bank (Fig. 1C,D). These two unfamiliarity values are assumed to have an antagonistic effect on the agent's behaviour by turning it towards attractive and away from repellent stimuli, with the balance between the two drives determining the agent's turning amplitude. We modelled this by a simple subtraction resulting in a raw overall drive:

$$\text{Raw overall drive} = (\text{attractive unfamiliarity value} - \text{repellent unfamiliarity value}) / 0.2. \quad (1)$$

We normalized the value of this drive by always using the same value (0.2 in our world), corresponding roughly to the unfamiliarity score obtained between views from locations in the virtual world that are far apart, so that raw overall drive will be contained between  $-0.5$  and  $0.5$ . A negative value thus indicates that 'attractive unfamiliarity' < 'repellent unfamiliarity'. A positive value indicates that 'attractive unfamiliarity' > 'repellent unfamiliarity'. We then transformed raw overall drive into overall drive with values ranging from 0 to 1 using a simple sigmoid function:

$$\text{Overall drive} = \text{sigmoid}(\text{raw overall drive}). \quad (2)$$

As a result, the overall drive tends towards 0 if 'attractive unfamiliarity' < 'repellent unfamiliarity', towards 1 if 'attractive unfamiliarity' > 'repellent unfamiliarity' and is 0.5 if 'attractive unfamiliarity' = 'repellent unfamiliarity'. In other words, a low score indicates that the current view matches a view in the attractive memory bank better than in the repellent memory bank and a high score indicates that the current view matches a view in the



repellent memory bank better than in the attractive memory bank (Fig. 1C).

To drive the agent, we used a similar approach to Kodzhabashev and Mangan (2015). The agent is a simple dot in space ( $x, y$ ) with a current heading ( $\theta$ ). The agent has a continuously running oscillator alternating between left mode and right mode, which controls the current turning direction. For simplicity, we modelled this by alternating the turning direction at each time step (left–right–left–right) as in Kodzhabashev and Mangan (2015). The resulting paths typically show sharp zigzags; however, it is worth noting that alternating turning direction every 4th step produces smoother oscillations that better resemble real ant paths (Fig. 1E).

Turn direction is thus purely controlled by the oscillator; however, the turn amplitude (deg) is directly dependent on the current overall drive (see above): that is, on the current view familiarities:

$$\text{Turn amplitude} = \text{gain} \times \text{overall drive}. \quad (3)$$

We used a single parameter (gain) to convert the overall drive (between 0 and 1) into the angular value for the turn amplitude. We used gain=180, so that the turning amplitude would vary between 0 deg (if overall drive=0) and 180 deg (if overall drive=1), with 90 deg if overall drive=0.5, i.e. if attractive and repellent unfamiliarity values are equal.

Across time steps ( $n$ ), the agent orientation ( $\theta$ ) will thus alternate between left and right turns  $[(-1)^n]$ , with each turn varying between 0 and 180 deg:

$$\theta(n+1) = \theta(n) + [\text{turn amplitude} \times (-1)^n] + \text{noise}. \quad (4)$$

To ensure that the agent is robust against the intrinsic noise of the real world, we added noise at each time step, as a random angular value drawn from a Gaussian distribution (mean=0; s.d.=10 deg).

Requests for the python code for the model should be directed to A.W.

#### Agent on a fictive treadmill

We simulated agent behaviour on a fictive treadmill by preventing forward motion. That is, at each time step we assumed that the agent (1) obtains the current view and computes its overall drive (Eqns 1 and 2); and (2) turns on the spot with turn direction determined by the state of the oscillator and turn amplitude (Eqns 3 and 4). As the location at which the agent is standing does not change, the view perceived at each time step only varies depending on the agent's current orientation. The agent on the treadmill was tested at different release locations and we recorded the resulting behaviour.

#### Using attractive visual memories only

We also tested the agent using the attractive memory bank only. In that case:

$$\text{Raw overall drive} = \text{attractive unfamiliarity}/0.2 - 0.5. \quad (5)$$

Given that attractive unfamiliarity is always positive, we removed 0.5 during normalization to centre the raw overall drive on 0, ranging roughly from −0.5 to 0.5 in the same way as when combining attractive and repellent memories. We then used the same sigmoid function to obtain an overall drive between 0 and 1 (Eqn 2).

## RESULTS

### *Myrmecia croslandi* ants released on the treadmill

Irrespective of whether they were caught in a ZV or FV state, tethered ants behaved differently when placed 6.5 m west of the nest (off-route; Fig. 2A, left), 6.5 m south of the nest (on-route; Fig. 2B, middle) or over the nest (nest; Fig. 2A, right).

In the off-route and on-route locations, most intended paths of both ZV and FV ants were goal directed either to the nest or to the individuals' specific foraging trees (see inset circular histograms in Fig. 2). This is to be expected for *M. croslandi* foragers, which ignore path integration information in the FV state as long as the landmark panorama provides navigational information (see Narendra et al., 2013; Zeil et al., 2014). The paths tended to be straight (see Fig. 3D). In contrast, over the nest, ZV ants moved in random directions, while FV ants tended to move roughly along the home vector direction to the north (at 90 deg; Fig. 2A, right, black tracks; see also Fig. 3B). Both ZV and FV ants at the nest changed their walking direction frequently. Inset histograms show that most tethered ants over the nest ended up after 5 min at final virtual distances less than 10 m from the nest (median 6.07 m), while at the on-route location, most ants reached much larger virtual distances (median 12.61 m) in the same amount of time (Wilcoxon rank sum test: nest versus on-route distances are different:  $P=0.0045$ ,  $z=-2.8378$ ; see Fig. S2A). The median distances reached at the off-route location were not larger than the ones at the nest (median 6.2 m), owing to a conspicuous peak at small distances contributed by ants that were lost at this location.

The behaviour of ants at the off-route location is interesting primarily because most ants are home directed despite it being unlikely that they have ever been to this location before (see inset circular histogram, Fig. 2A, left). A heat map of the foraging movements of 124 ants from this nest that had been DGPS tracked on their outward foraging trips over 2 years shows that no ant had moved off-route of the nest for more than a few metres (Fig. 2A, middle). Some of the tethered ants appeared to have headed towards their foraging trees or the foraging corridor in a south-easterly direction; however, when we tracked ants that were released just north of the off-route location, many did initially walk for 2 m or so in a south-easterly direction before turning east toward the nest (Fig. 2B, left). Tethered ants at the off-route location must therefore get their bearing by comparing what they currently see with nest-directed views they are likely to have gathered during their learning walks, which can extend up to 4 m from the nest (Fig. 2B, right; see also Jayatilaka et al., 2018).

Both FV and ZV ants at the on-route location decided to move either back toward the nest or south toward their foraging trees (Fig. 2B, centre). Otherwise, they moved in a similar way to when at the off-route location. Most of them moved fast, straight and for distances far exceeding those needed to reach the nest or the trees.

The most conspicuous feature of paths at the nest location is the fact that the initial walking direction of ZV ants was random, while that of FV ants was in the general home vector direction (north) and that both ZV and FV ants changed walking direction frequently.

We quantified these differences between locations in three ways (see Fig. 3), considering final bearings, the relationship between path length and distance reached, and changes in walking direction. Fig. 3A shows the initial paths of ants at the three locations in more detail to emphasize the different behaviours and to highlight the additional fact that paths are fairly smooth at the off-route and on-route locations, but show a distinct sinusoidal oscillation at the nest location. With the exception of the bearings of ZV ants at the nest (Fig. 3C, right) and those of FV ants after 5 min at the off-route and

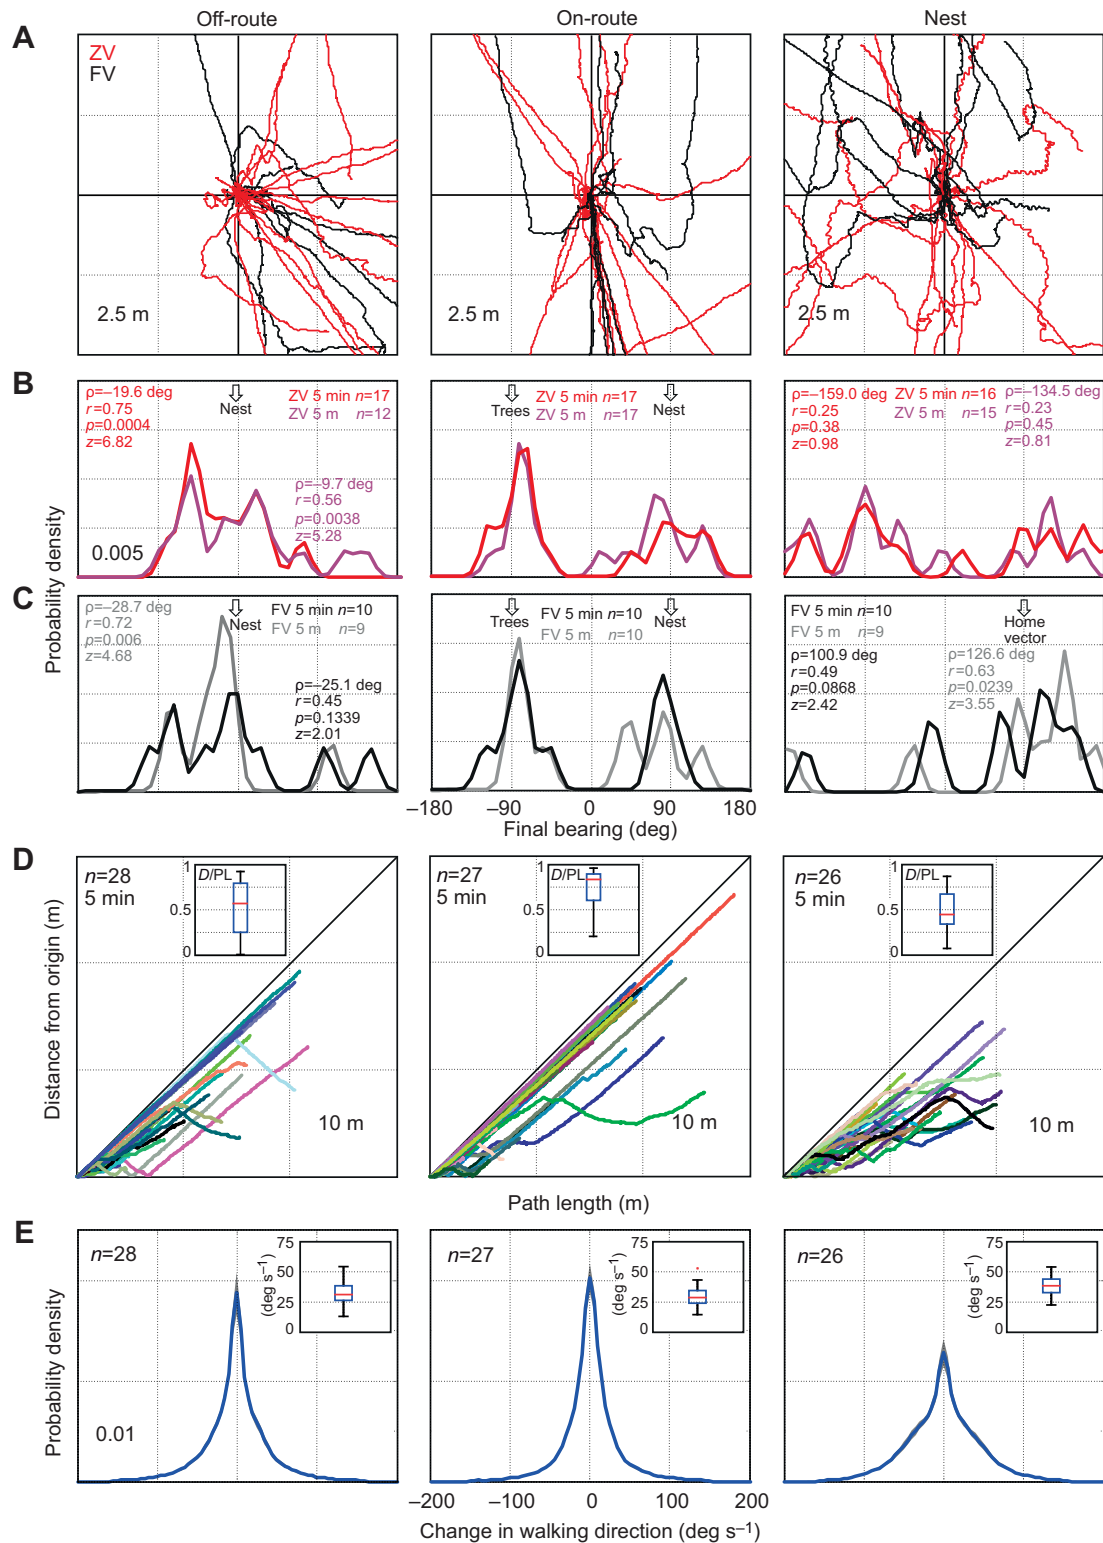

**Fig. 3. Quantitative analysis of behavioural differences at the off-route, on-route and nest location.** (A) Initial intended paths of tethered ants at a finer scale. The paths of ZV ants are shown in red and those of FV ants are in black. (B) Distribution of final bearings of ZV ants after 5 min (red) or having reached a virtual distance of 5 m from the start (purple) at the three locations. Probability densities were determined with 9 deg bandwidth of the kernel smoothing window; North is at +90 deg. Inset numbers show results of circular statistics (Rayleigh test of uniformity);  $\rho$ , mean vector direction;  $r$ , mean vector length;  $p$ , probability of uniformity;  $z$ , z-statistic. Arrows mark the direction of the nest and trees. (C) Distribution of final bearings for FV ants after 5 min (black) or having reached a virtual distance of 5 m from the start (grey). Arrows mark the direction of nest, trees and home vector. Other conventions as in B. (D) Distance (D) from start over path length (PL) for the first 5 min of paths at the three locations. Paths are randomly coloured. Insets show boxplots with red median marked for the ratios of distance over path length at the end of 5 min. See Fig. S2B for statistics. (E) Distribution of changes in walking direction for all 5 min paths at the three locations. Shown are the means of individual distributions (blue) and standard errors (in grey – not visible). Insets show boxplots for the distributions of individual means. See Fig. S2C,D for statistics.

the nest location (Fig. 3C, left and right), the virtual bearings of ants after 5 min or at 5 m distance from the start were all significantly different from uniform distributions, both for ZV ants (Fig. 3B) and FV ants (Fig. 3C). While the distributions were unimodal for the off-route and nest location (see insets in Fig. 3B,C for circular statistics), they were clearly bimodal at the on-route location.

One measure of the straightness of paths is the way in which the straight-line distance from the start depends on path length (Fig. 3D), with straight paths without changes in direction lying close to the line of equality. After 5 min, the distribution of the ratios of final distance to final path length differed between the sites (see Fig. 3D inset; Fig. S2B inset) with the on-route paths being significantly straighter with a median ratio of distance over path length of 0.83, compared with 0.62 at the off-route location and of 0.45 at the nest location (Wilcoxon rank sum test at 5% significance level: on-route versus off-route:  $P=0.0110$ ; on-route versus nest:  $P=8.4992e^{-4}$ ; off-route versus nest:  $P=0.6$ ; see Fig. S2B).

Finally, the behaviour of ants at the three sites also differed on a finer scale: the distribution of changes in path direction was much broader at the nest site, compared with the off-route and on-route location (Fig. 3E), reflecting the conspicuous oscillations of ant paths over the nest (see Fig. 3A, right). Note that these distributions had very long tails due to spikes of very high angular velocity which may be artefacts of trackball rotations when the ants were moving very slowly (see time series in Fig. 4). To test whether changes in path direction were indeed systematically larger at the nest location, we calculated the means of their absolute values at 11 frames  $s^{-1}$  over the first 5 min of walking for each ant and compared their distributions, both for angular velocities smaller than 200  $deg\ s^{-1}$  (Fig. 3E inset; Fig. S2C inset) and for all angular velocities (Fig. S2D). Below 200  $deg\ s^{-1}$ , nest paths were indeed wigglier compared with on-route paths (Fig. S2C; Wilcoxon rank sum test: nest versus on-route  $P=2.56e^{-4}$ ,  $z=-3.6563$ ), with the difference between nest and off-route location just failing to reach significance (nest versus off-route  $P=0.019$ ,  $z=-2.3458$ ). Considering the whole range of angular velocities (Fig. S2D), there was no difference between nest and the other locations, mainly because of the high angular velocities exhibited by ants at all sites.

We note that many ants at various times during the first 5 min on the trackball over the nest showed very regular path oscillations as documented in Fig. 3A and for three examples in Fig. 4 (red traces). The distribution and the time course of changes in path direction over the nest were different from those exhibited by the same ants at the on-route location (shown in blue in Fig. 4). Regular and sustained path oscillations led to periodicities in the auto-correlation function of changes in path direction and could be detected in 13 out of 25 cases of ants participating in all three locations (blue traces in Fig. S3), compared with 4/25 at the off-route location (red traces in Fig. S3) and 1/25 at the on-route location (green traces in Fig. S3). We add the caveat that the statistics of path properties are unlikely to be stationary during an experiment and that this particular aspect of ant behaviour will require future attention.

### Agent-based modelling

To model the agent on a fictive treadmill, we prevented it from stepping forward, so that views were always perceived from the same spot, and were rotated according to the agent's current facing direction. We released the agent at four locations.

When tested close to the beginning of the homing route (on-route paths), the agent oriented mostly in the correct direction; that is, along the route towards the nest (blue paths in Fig. 5A). This is because the overall drive is close to 0 while facing in this direction

[the attractive unfamiliarity is very low and the repellent unfamiliarity is high (Fig. 1C) yielding very small turns (Fig. 5B,C)]. Note that if the agent happened to face in the opposite direction (as a result of noise), the overall drive would strongly increase and thus trigger a large turn.

When released away from the route (off-route paths), the agent also favoured one direction, indicating that this direction provided a smaller overall drive (yellow paths in Fig. 5A). This is an indication that the view at the off-route location and the nest-directed learning walk views were most familiar because their comparison produced a detectable minimum of the rotIDF and that the agent thus favoured a direction roughly pointing towards the nest.

When released on top of the nest (nest paths), the agent produced convoluted paths with no preferred direction (red paths in Fig. 5A). This is due to the rather uniform distribution of visual familiarities across directions (see Fig. 1C). At a more local scale, the paths showed much larger turn amplitudes than at the on-route or off-route paths (Fig. 5B,C). This is because, at the nest location, attractive and repellent memorized views provided a roughly equal match whatever the current facing direction, resulting in an overall drive around 0.5, thus yielding turns that were larger than when attractive and repellent memories matched best for different directions (see Fig. 1C).

When released at a distant unfamiliar location (distant path), the agent displayed equally large turn amplitudes to those at the nest (marked in black in Fig. 5A–C) because, as for the nest location, the attractive and the repellent memory bank provided roughly equal unfamiliarity values, thus resulting in an average overall drive around 0.5.

In contrast, when using the attractive memory bank only, turn amplitudes were large at the distant unfamiliar location (black) but comparatively low at the nest (red, Fig. 5, right). This is because the unfamiliarity value is high in the unfamiliar location (yielding a strong directional drive and thus large turns), and low at the nest because of the good match with learning walk views (yielding a low directional drive and thus small turns).

### Testing model predictions with *M. croslandi*

Motivated by the different simulation results when using 'attractive only' and 'attractive/repellent' memory banks as well as by the rather counter-intuitive outcome that the use of attractive/repellent memories predicts a similar behaviour at the familiar nest location and at a completely unfamiliar location, we released *M. croslandi* ants mounted on the trackball both at the nest and at a distant location about 50 m south-west of the nest. The location was far beyond the ants' foraging trees and thus was likely to be completely unfamiliar to the ants. Strikingly, ants at this distant release location behaved in a similar way to that at the nest, both in terms of the ratio between the distance reached after 5 min and the path length (see box plot insets in Fig. 6A, centre; Wilcoxon rank sum test unfamiliar versus nest location:  $P=0.7984$ , ranksum=71) and in terms of the mean absolute change in walking direction (see box plot insets in Fig. 6A, right; Wilcoxon rank sum test unfamiliar versus nest location:  $P=0.9591$ , ranksum=67). The ants at both the unfamiliar and the nest site also displayed the characteristic path oscillations we observed at the nest in our previous experiments (compare Fig. 6A, B with Fig. 4), as predicted by the attractive/repellent model.

### DISCUSSION

Our behavioural experiments revealed three fundamental properties of visual navigation in ants that could only be uncovered using the trackball method. First, we determined that whether on-route or off-

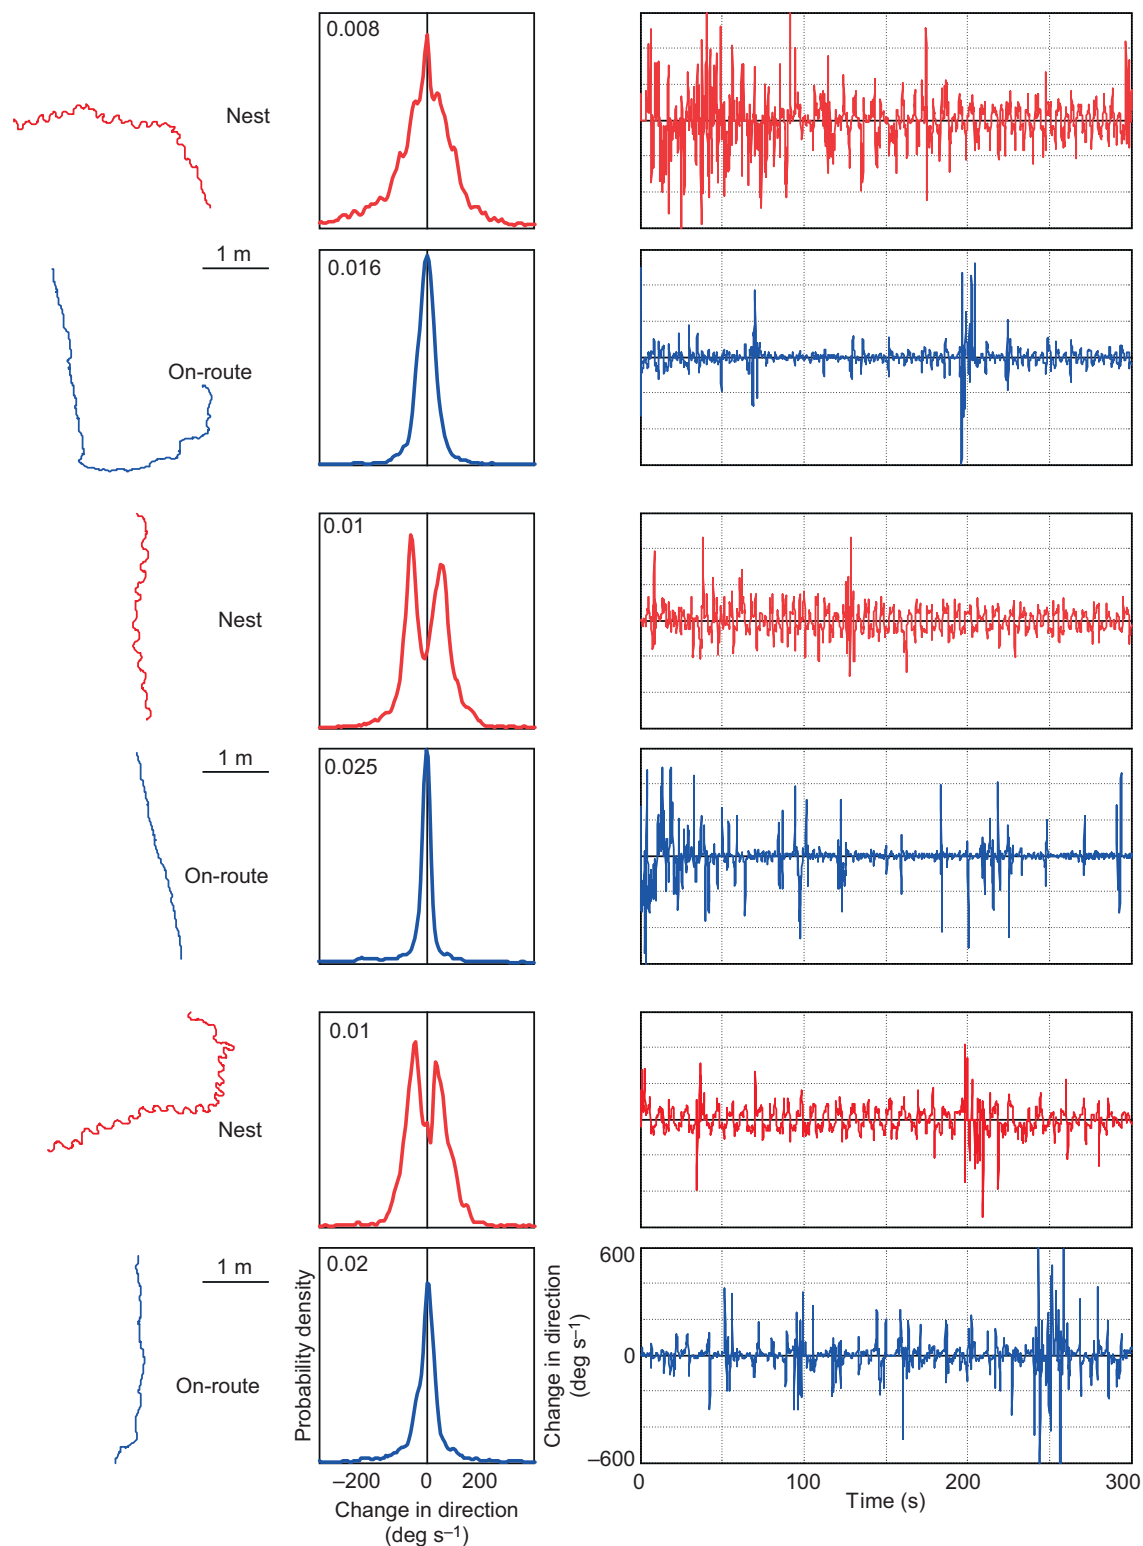

**Fig. 4. Ants walk differently at the nest and the on-route location.** Shown are path segments (left), the distribution of changes in walking direction during the first 5 min (middle) and the time series of changes in walking direction over 5 min (right) for three ants (top, centre, bottom), each recorded at the nest (red) and at the on-route location (blue). Changes in walking direction were determined at 11 frames s<sup>-1</sup> to reduce measurement noise. See Fig. S3 for auto-correlation functions.

route, several metres away from the nest, ants can recover the goal direction without the need to physically move and sample neighbouring locations. Second, we found no evidence that they 'expect' outcomes from their behaviour, such as a changing visual

scene or increasing certainty about the location of the nest. *Myrmecia croslandi* ants showed no evidence of monitoring the distance that separates them from the goal, unlike for instance ants that rely strongly on path integration (Dahmen et al., 2017). Third,



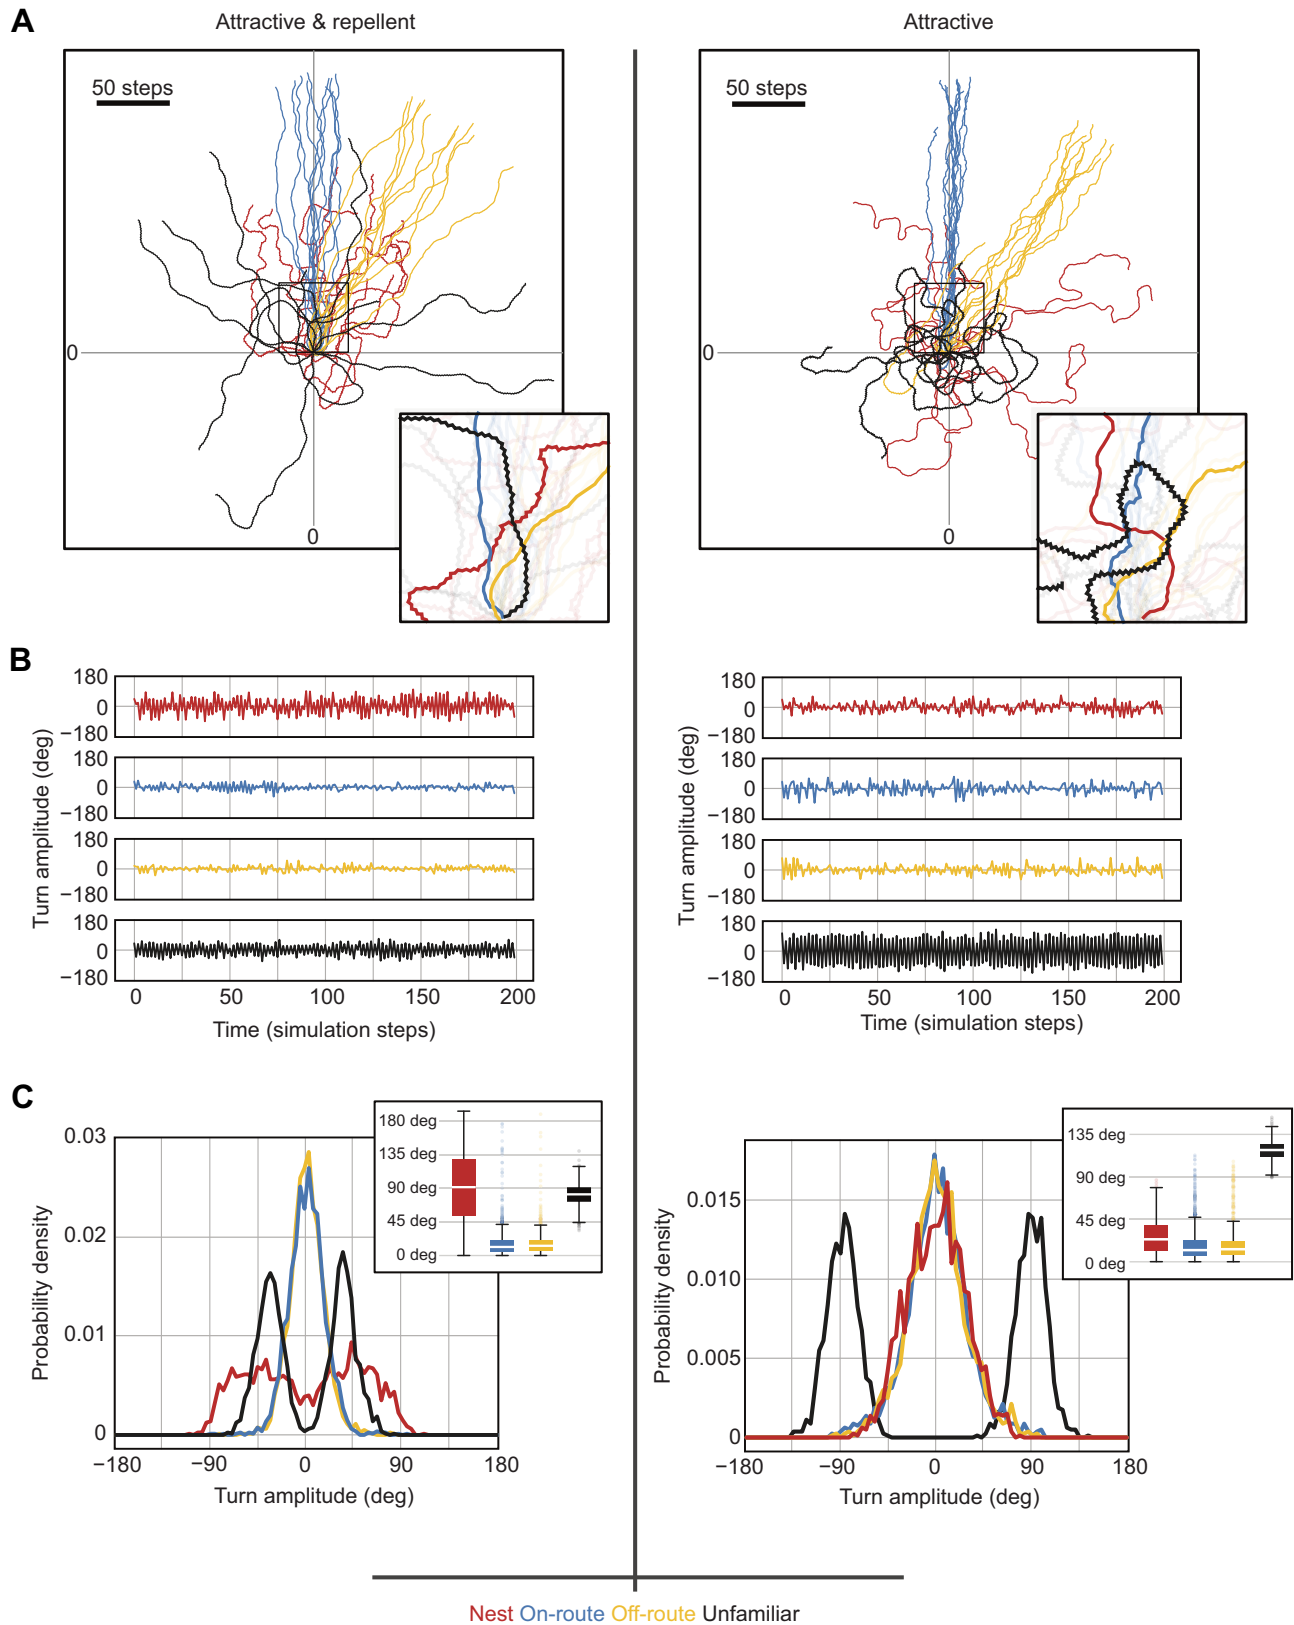

**Fig. 5. Results of agent-based visual navigation using both attractive and repellent views (left) and attractive views only (right).** We simulated 10 agents walking 200 steps at each nest (red), on-route (blue), off-route (yellow) and unfamiliar (black) release locations. (A) Resulting paths. Insets show close-up details of example paths. (B) Turn amplitudes over time (simulation steps) for one example at each of the release locations. (C) Probability density of turn amplitudes at the four release locations. Insets show box and whisker plots for the same distributions.

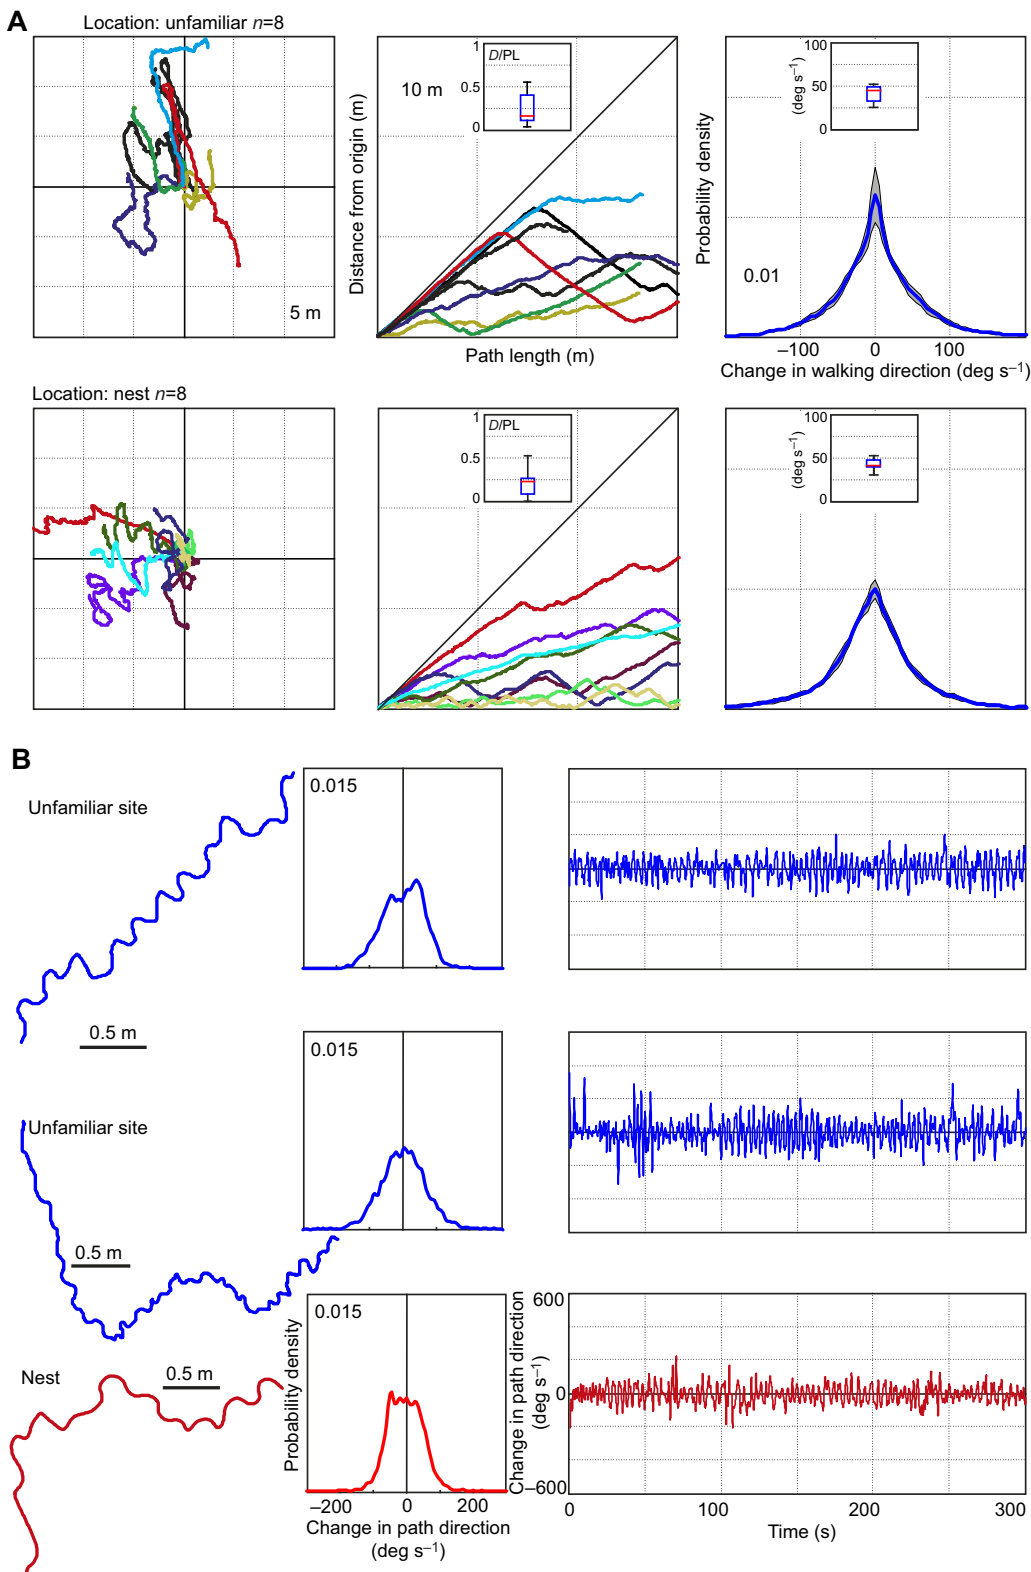

**Fig. 6. Ants behave in a similar way at a completely unfamiliar location and at the nest.** (A) Top: paths (left), distance from start over path length (middle) and probability density of changes in walking direction (right) for 8 tethered ants at a completely unfamiliar location. Bottom: as for A, for 8 ants at the nest location. Insets in middle panels show boxplots of final distance to path length ratios after 5 min, which are not different between the unfamiliar and the nest location (Wilcoxon rank sum test unfamiliar versus nest location:  $P=0.7984$ , ranksum=71). Insets in right panels show the boxplots of mean absolute values of changes in path direction over 5 min, which are not different between the unfamiliar and the nest location (Wilcoxon rank sum test unfamiliar versus nest location:  $P=0.9591$ , ranksum=67). (B) Example paths (left), probability density of changes in path direction (middle) and time series of changes in path direction (right) for two ants at the unfamiliar site (blue) and one ant over the nest (red).

ants behave differently when positioned above the nest, by following random heading directions and frequently changing their walking direction. These are the characteristics of search behaviour and thus could be interpreted as indicating that ants 'know' that they are at the nest, as if they possessed location information. However, our simulation results demonstrate that the

nest-specific behaviour of ants can be parsimoniously explained by the density of attractive, nest-directed, and repellent views away from the nest that at least *M. croslandi* ants are likely to acquire in the course of systematic scanning movements during their learning walks (e.g. Jayatilaka et al., 2018). Our simulation also confirms that the same parsimonious mechanism can recover a correct direction

from on- and off-route locations, as previous modelling has indicated (Baddeley et al., 2011, 2012; Narendra et al., 2013; Wystrach et al., 2013a; Kodzhabashev and Mangan, 2015).

### Alignment matching and visual memories

Current thinking holds that ants during their learning walks learn nest-directed views (*Cataglyphis* sp.: Fleischmann et al., 2016, 2017, 2018a,b; *Ocymyrmex robustior*: Müller and Wehner, 2010; *Melophorus bagoti*: Wehner et al., 2004; Muser et al., 2005) and possibly both nest-directed views and views pointing away from the nest (*M. croslandi*: Jayatilaka et al., 2018; Zeil and Fleischmann, 2019). In addition, they memorize the views they experience along routes as they go back and forth on foraging excursions (Wehner et al., 1996; Mangan and Webb, 2012; Kohler and Wehner, 2005; Wystrach et al., 2011b; Freas and Spetch, 2019).

When using their visual memories to navigate, the currently perceived panorama provides a heading direction if the comparison between memorized views and the current view generates a detectable minimum of the rotational image difference function (see Narendra et al., 2013). This is a basic measure of familiarity and at any location, the direction presenting the most familiar view would provide the deepest (lowest) minimum. At both the on-route and off-route location, ants on the trackball were free to scan the panorama and detect the direction of any present minima. Our results show that they were successfully able to recover the goal direction by doing so (Fig. 2). On route, some ants headed to the nest while others aimed at their foraging trees, reflecting their motivation to home or to forage.

While the directedness of ants at the on-route site would have been supported by both learning walk views and views learnt along the route, their directedness at the off-route (west) location depends on their detecting a higher similarity with learning walk views directed at the nest from the west compared with all other nest-directed views. As shown here and before (Narendra et al., 2013; Zeil et al., 2014; Stürzl et al., 2015), this is possible up to 10–15 m distance from the nest in the open woodland habitats of *M. croslandi* ants, provided ants have acquired such nest-directed views about 1–5 m away from the nest (see Fig. 2B, right).

When released at the nest, ants behaved differently. They walked in various directions and displayed larger turns that regularly alternated between left and right, resulting in sinusoidal paths. So are nest views special?

As far as navigational information is concerned, the situation at the nest is indeed different compared with that for both on- and off-route sites. During their learning walks, ants will have encountered a dense set of views at different distances and compass bearings around the nest, each potentially tagged with the nest direction through path integration (Müller and Wehner, 2010; Graham et al., 2010; Baddeley et al., 2012; Fleischmann et al., 2018a; Jayatilaka et al., 2018; Zeil and Fleischmann, 2019). In contrast to other locations, tethered ants placed above the nest location thus will encounter attractive familiar views (or deep rotIDF minima) in many compass directions, which might explain why they initially walked in various directions at this location.

The high-amplitude oscillation displayed by ants at the nest location, however, is puzzling. Previous models suggest that experiencing a familiar (attractive) view should inhibit turns and favour forward motion (Zeil, 2012; Möller, 2012; Baddeley et al., 2011, 2012; Wystrach et al., 2013a; Kodzhabashev and Mangan, 2015; Ardin et al., 2016), which is clearly not the case here. The behaviour of tethered ants on top of the nest can be interpreted as a search for the nest entrance, which in ants relying on path integration

is characterized by frequent changes in path direction and a systematic pattern of increasing loops around the expected location of the goal (e.g. Schultheiss et al., 2015). To our knowledge, however, no analysis of the fine-scale changes in orientation of searching ants – as we observed them here – has been done to date.

Previous work has suggested that the recognition of views memorized at the nest may trigger specific behaviours when the ant is subsequently released in unfamiliar locations (Wystrach et al., 2013b). This interpretation may suggest positional knowledge, or at least that views close to the nest are categorized separately from route views during learning and being treated differently when recognized. In the following, we discuss the results of our simulation that suggest a parsimonious and unifying explanation for view-based route guidance, pinpointing goals and the current observation of high-amplitude oscillation at the nest without the need to invoke positional knowledge or the need for a ‘trigger’ of search behaviour. Our agent-based modelling exhibits the same pattern of fine-scale oscillations, including overall changes in path direction, but only if we assume that the agent operates with both attractive and repellent memory banks.

### Continuously integrating attractive and repellent views

Our model was developed quite independently (Le Moël and Wystrach, 2019 preprint) to explain other recently observed phenomena, such as how ants manage to use views for guidance while walking backward and thus facing in the anti-nest direction (Schwarz et al., 2019 preprint); or how ants learn to detour areas along their route associated with an aversive experience (Wystrach et al., 2019b preprint). Interestingly, this new model happens to also capture the current results remarkably well. The model is based on two assumptions: (1) that ants store both attractive and repellent views during their learning walks, as suggested by Jayatilaka et al. (2018), and (2) that guidance involves an oscillator resulting in a continuous alternation between left and right turns (Namiki and Kanzaki, 2016; Kodzhabashev and Mangan, 2015; Wystrach et al., 2016). The model assumes no positional knowledge whatsoever, only procedural knowledge.

Several pieces of evidence suggest that insects possess an intrinsic oscillator triggering alternatively left and right body rotations, the amplitude of which can be modulated by the stimuli perceived (Namiki and Kanzaki, 2016; Lent et al., 2013; Wystrach et al., 2016). Such a control of oscillations can provide guidance along odour plumes (Namiki and Kanzaki, 2016) and odour gradients (Wystrach et al., 2016), supports visual route following (Kodzhabashev and Mangan, 2015) and greatly facilitates the integration of different sources of stimulation (Wystrach et al., 2016). In the case of visual route following, the amplitude of the oscillations needs to be modulated by the familiarity of the currently perceived view. The suggestion is that familiar views trigger small turns whereas unfamiliar views trigger large turns, and that the direction of the turn is dependent on the current state of the oscillator. Because views are assumed to be memorized while moving along the route, during route recapitulation, visual familiarity is higher when facing in the correct route direction. This model is sufficient for an agent to recapitulate a route in naturalistic environments (Kodzhabashev and Mangan, 2015). However, when released at the nest, this model does not predict large-amplitude oscillations such as the ones we observed here in ants. On the contrary, because of the high familiarity experienced at the nest, which results from the collection of nest-oriented views acquired during learning walks, the model predicts an inhibition of the oscillations whatever the current facing direction (see Fig. 5, right).

The visual memories used by insect navigators are probably stored in the mushroom bodies (Webb and Wystrach, 2016), but current models assume only the existence of attractive memories (Möller, 2012; Baddeley et al., 2011; 2012; Wystrach et al., 2013a; Kodzhabashev and Mangan, 2015; Ardin et al., 2016). Here, we incorporated into the model the recent suggestion that ants store both attractive and repellent views, mimicking the so-called appetitive/aversive output pathways from the insect mushroom bodies (e.g. Oswald et al., 2015; Saumweber et al., 2018) (Fig. 1D). Indeed, during their learning walks, many ants, not only *M. croslandi* (Jayatilaka et al., 2018), display regular head and body oscillations, facing alternatively towards and away from the nest (Zeil and Fleischmann, 2019). We assumed in our model that these views form two distinct memory banks – one holding attractive, nest-directed, views and one holding repellent views pointing away from the nest – and that the two sets are used continuously and simultaneously during homing. Our agent compares the current view with both sets of memories at each time step and thus obtains two familiarity values, one for attraction (high familiarity, inhibiting turns) and one for repulsion (high familiarity, triggering large turning amplitudes). Given that both memory pathways have antagonist outcomes, they can be integrated by subtracting attractive and repellent familiarity values, resulting in what we called here an overall drive, which modulates the amplitude of the oscillator (Fig. 1C).

Interestingly, this model closely mimics ant behaviour as documented in our behavioural experiments. If released on a fictive treadmill (preventing the agent from translating), it displays high-amplitude turns when released on top of the nest, and much lower amplitude turns when released further along the homing route. In contrast, when using the attractive memory bank only, the agent produces low-amplitude turns at the nest (Fig. 5).

The behaviour of the agent when combining attractive and repellent views is straightforward to explain (Fig. 1C). At the route release point, facing in the correct direction, the simulation generates very small turns because only the attractive memory bank provides a good match. By integrating this with a high unfamiliarity of the repellent memory bank, we obtain a very low overall drive, and thus small turns. However, when released at the nest, whatever the direction the agent faces, there are always both attractive and repellent views that are matching the current view (Fig. 1C), the reason being that these views, when acquired during learning walks, are experienced in multiple compass directions at very closely spaced locations (Fig. 1B). Both attractive and repellent pathways signal high familiarity values and cancel each other out, resulting in large turns.

### Testing the model's prediction

Interestingly, the attractive/repellent memory bank model makes a rather counterintuitive prediction, because it relies on the relative difference in familiarity between attractive and repellent pathways and not on the absolute familiarity experienced: the agent's behaviour should be similar when on top of the nest and at a completely unfamiliar location, outside the catchment area of acquired views. At the nest, both attractive and repellent memories result in high familiarity, so their signals cancel each other when integrated (attractive–repellent), resulting in large turns. In completely unfamiliar terrain, both attractive and repellent memories result in very low familiarity, and thus their signals equally cancel each other when integrated (attractive–repellent), also resulting in large turns (Fig. 1C).

As predicted by the model, our experiments indeed showed that ants tethered at a completely unfamiliar location exhibited a very

similar behaviour to that when released on top of the nest: that is, they displayed regular high-amplitude path oscillations (Fig. 6).

### Integration with path integration

We did not incorporate integration of path integration information and landmark panorama guidance in our model and so do not at this stage tackle the fact that FV ants (i.e. those captured with a remaining path integration home vector) showed a small bias towards the home vector direction at the nest location (Figs 2 and 3, FV versus ZV ants). In *M. croslandi* foragers, as in other ants, path integration information and scene information are integrated (Collett et al., 2001; Collett, 2012; Reid et al., 2011; Legge et al., 2014; Narendra et al., 2013; Wystrach et al., 2015; Wehner et al., 2016), with familiar views more strongly weighted – to the degree that a current view providing information on heading direction can completely override conflicting information from path integration (Kohler and Wehner, 2005; Narendra et al., 2013; Zeil et al., 2014). In ants that rely heavily on path integration, this information is more strongly weighted as the length of the vector increases (Wystrach et al., 2015; Wystrach et al., 2019a). The bias towards the home vector direction observed here in FV ants fits this current view, which is summarized in a recent model (Hoinville and Wehner, 2018). Also, experienced ants seem to rely less on path integration than naive ants, and rather display a search when on unfamiliar terrain (Schwarz et al., 2017a), which may explain why path integration information is never strongly weighted in the long-lived *M. croslandi*.

### Outlook

Our results may contribute to the lingering debate about the format of spatial knowledge underlying visual navigation in insects and animals in general (e.g. Cheeseman et al., 2014a,b; Cheung et al., 2014; Warren, 2019). We showed that ants released on top of the nest displayed large turns. These results are clearly at odds with the current procedural models, stipulating that the high familiarity of views at the nest should inhibit turns. In contrast, the ants' behaviour suggested that they could derive positional knowledge from the current views, given the interpretation that the ants searched because they recognized that they were at the nest. Previous results, such as the apparent ability of insects to make shortcuts, also favoured explanations assuming positional rather than procedural knowledge (e.g. Cheeseman et al., 2014a,b; Warren, 2019). However, as often in the insect literature (Cartwright and Collett, 1987; Collett et al., 2007; Cruse and Wehner, 2011; Wystrach and Graham, 2012; Narendra et al., 2013; Cheung et al., 2014), an alternative, more parsimonious explanation can also explain our results: ants may simply combine attractive and repellent memories. Importantly, this procedural explanation did not come from actively seeking for it, but emerged from other observations, such as the way in which ants behave when learning views around the nest (Jayatilaka et al., 2018), how they avoid adverse situations (Wystrach et al., 2019b preprint), how they steer while walking backwards (Schwarz et al., 2017b; Schwarz et al., 2019 preprint), as well as how appetitive and aversive memory pathways are combined in other insects such as flies (Felsenberg et al., 2018) and fly larvae (Eichler et al., 2017).

Our simulation made the unexpected prediction that behaviour in completely unfamiliar terrain should be the same as at the very familiar nest, which we confirmed by subsequent experimentation. Purely scene familiarity-based modelling replicates these results with astonishing detail, providing support for the suggestion that ants during their learning walks acquire both attractive, nest-directed



views and repellent views when pointing away from the nest during systematic scanning movements (Jayatilaka et al., 2018; Zeil and Fleischmann, 2019). It is not clear at present, however, whether all views are memorized irrespective of gaze direction or only when the ants' head is aligned parallel to the home vector (see discussion in Jayatilaka et al., 2018). We show here, at least, that the distinctly different behaviour of ants over the nest location can be replicated if an agent has an attractive and a repellent scene memory bank.

The most parsimonious explanation for our observations is therefore that the ants operate on procedural rather than location information (*sensu* Collett et al., 2002; Wehner et al., 2006; Graham and Philippides, 2017): at both familiar and unfamiliar locations away from the nest they may know where to go, but they do not know where they are. Moreover, the main assumptions of our simulation – attractive and repellent view comparison driving an oscillator – can be tested by a detailed comparison of the gaze and path directions of individually identified ants during their learning walks and during their subsequent approach to the nest, when returning from foraging excursions. Such an analysis may also reveal how ants eventually pinpoint the nest entrance, which none of the current homing models can properly explain.

#### Acknowledgements

We thank Chloé Raderschall and Piyankarie Jayatilaka for tracking ants over the years, Camille Moray, Fiorella Ramirez-Esquivel and Moosarraza Zahedi for help with field work, and the mechanical workshop of the Research School of Biology for constructing the housing for the trackball contraption. We are grateful to Marijke Welvaert and Teresa Neeman from the ANU Statistical Consulting Unit for their advice and to two referees for their constructive comments.

#### Competing interests

The authors declare no competing or financial interests.

#### Author contributions

Conceptualization: T.M., Z.K., A.N., A.W., J.Z.; Methodology: T.M., Z.K., H.D., A.N., F.L., A.W., J.Z.; Software: T.M., Z.K., H.D., F.L., A.W., J.Z.; Validation: T.M., Z.K., J.Z.; Formal analysis: T.M., Z.K., F.L., A.W., J.Z.; Investigation: T.M., Z.K., A.N., F.L., A.W., J.Z.; Resources: J.Z.; Writing - original draft: T.M., A.W., J.Z.; Writing - review & editing: T.M., Z.K., H.D., A.N., A.W., J.Z.; Visualization: T.M., A.W., J.Z.; Supervision: J.Z.; Project administration: J.Z.; Funding acquisition: A.N., J.Z.

#### Funding

We acknowledge financial support from the Australian Research Council, Discovery Project Grant (DP150101172), Future Fellowship (FT140100221), the Hermon Slade Foundation (HSF 10/7), the Australian National University Endowment Fund and the European Research Council (ERCstg: EMERG-ANT 759817).

#### Supplementary information

Supplementary information available online at <http://jeb.biologists.org/lookup/doi/10.1242/jeb.210021.supplemental>

#### References

- Ardin, P., Peng, F., Mangan, M., Lagogiannis, K. and Webb, B. (2016). Using an insect mushroom body circuit to encode route memory in complex natural environments. *PLoS Comp. Biol.* **12**, e1004683. doi:10.1371/journal.pcbi.1004683
- Baddeley, B., Graham, P., Philippides, A. and Husbands, P. (2011). Holistic visual encoding of ant-like routes: navigation without waypoints. *Adaptive Behav.* **19**, 3–15. doi:10.1177/1059712310395410
- Baddeley, B., Graham, P., Husbands, P. and Philippides, A. (2012). A model of ant route navigation driven by scene familiarity. *PLoS Comp. Biol.* **8**, e1002336. doi:10.1371/journal.pcbi.1002336
- Cartwright, B.A. and Collett, T.S. (1987). Landmark maps for honeybees. *Biol. Cybernet.* **57**, 85–93. doi:10.1007/BF00318718
- Cheeseman, J. F., Millar, C. D., Greggers, U., Lehmann, K., Pawley, M. D. M., Gallistel, C. R., Warman, G. R. and Menzel, R. (2014a). Way-finding in displaced clock-shifted bees proves bees use a cognitive map. *Proc. Natl Acad. Sci. USA* **111**, 8949–8954. doi:10.1073/pnas.1408039111
- Cheeseman, J. F., Millar, C. D., Greggers, U., Lehmann, K., Pawley, M. D. M., Gallistel, C. R., Warman, G. R. and Menzel, R. (2014b). Reply to Cheung et al.: the cognitive map hypothesis remains the best interpretation of the data in honeybee navigation. *Proc. Nat. Acad. Sci. USA* **111**, E4398. doi:10.1073/pnas.1415738111
- Cheung, A., Collett, M., Collett, T. S., Dewar, A., Dyer, F. C., Graham, P., Mangan, M., Narendra, A., Philippides, A., Stürzl, W. et al. (2014). Still no convincing evidence for cognitive map use by honeybees. *Proc. Nat. Acad. Sci. USA* **111**, E4396–E4397. doi:10.1073/pnas.1413581111
- Collett, M. (2012). How navigational guidance systems are combined in a desert ant. *Curr. Biol.* **22**, 927–932. doi:10.1016/j.cub.2012.03.049
- Collett, T.S., and Zeil, J. (2018). Insect learning flights and walks. *Curr. Biol.* **28**, R984–R988. doi:10.1016/j.cub.2018.04.050
- Collett, T. S., Collett, M. and Wehner, R. (2001). The guidance of desert ants by extended landmarks. *J. Exp. Biol.* **204**, 1635–1639.
- Collett, M., Harland, D. and Collett, M. (2002). The use of landmarks and panoramic context in the performance of local vectors by navigating honeybees. *J. Exp. Biol.* **205**, 807–814.
- Collett, T. S., Graham, P. and Harris, R. A. (2007). Novel landmark-guided routes in ants. *J. Exp. Biol.* **210**, 2025–2032. doi:10.1242/jeb.000315
- Collett, M., Chittka, L. and Collett, T. S. (2013). Spatial memory in insect navigation. *Curr. Biol.* **23**, R789–R800. doi:10.1016/j.cub.2013.07.020
- Cruse, H. and Wehner, R. (2011). No need for a cognitive map: decentralized memory for insect navigation. *PLoS Comp. Biol.* **7**, e1002009. doi:10.1371/journal.pcbi.1002009
- Dahmen, H. J., Wahl, V. L., Pfeffer, S. E., Mallot, H. A. and Wittlinger, M. (2017). Naturalistic path integration of *Cataglyphis* desert ants on an air-cushioned lightweight spherical treadmill. *J. Exp. Biol.* **220**, 634–644. doi:10.1242/jeb.148213
- Eichler, K., Li, F., Litwin-Kumar, A., Park, Y., Andrade, I., Schneider-Mizell, C. M., Saumweber, T., Huser, A., Eschbach, C., Gerber, B. et al. (2017). The complete connectome of a learning and memory centre in an insect brain. *Nature* **548**, 175–182. doi:10.1038/nature23455
- Felsenberg, J., Jacob, P. F., Walker, T., Barnstedt, O., Edmondson-Stait, A. J., Pleijzier, M. W., Otto, N., Schlegel, P., Sharifi, N., Perisse, E. et al. (2018). Integration of parallel opposing memories underlies memory extinction. *Cell* **175**, 709–722.e15. doi:10.1016/j.cell.2018.08.021
- Fleischmann, P. N., Christian, M., Müller, V. L., Rössler, W. and Wehner, R. (2016). Ontogeny of learning walks and the acquisition of landmark information in desert ants *Cataglyphis fortis*. *J. Exp. Biol.* **219**, 3137–3145. doi:10.1242/jeb.140459
- Fleischmann, P. N., Grob, R., Wehner, R. and Rössler, W. (2017). Species-specific differences in the fine structure of learning walk elements in *Cataglyphis* ants. *J. Exp. Biol.* **220**, 2426–2435. doi:10.1242/jeb.158147
- Fleischmann, P. N., Grob, R., Müller, V. L., Wehner, R. and Rössler, W. (2018a). The geomagnetic field is a compass cue in *Cataglyphis* ant navigation. *Curr. Biol.* **28**, 1440–1444. doi:10.1016/j.cub.2018.03.043
- Fleischmann, P. N., Rössler, W. and Wehner, R. (2018b). Early foraging life: spatial and temporal aspects of landmark learning in the ant *Cataglyphis noda*. *J. Comp. Physiol. A* **204**, 579–592. doi:10.1007/s00359-018-1260-6
- Freas, C. A. and Spetch, M. L. (2019). Terrestrial cue learning and retention during the outbound and inbound foraging trip in the desert ant, *Cataglyphis velox*. *J. Comp. Physiol. A* **205**, 177–189. doi:10.1007/s00359-019-01316-6
- Graham, P. and Cheng, K. (2009). Ants use the panoramic skyline as a visual cue during navigation. *Curr. Biol.* **19**, R935–R937. doi:10.1016/j.cub.2009.08.015
- Graham, P. and Philippides, A. (2017). Vision for navigation: what can we learn from ants? *Arthropod Struct. Dev.* **46**, 718–722. doi:10.1016/j.asd.2017.07.001
- Graham, P., Philippides, A. and Baddeley, B. (2010). Animal cognition: multimodal interactions in ant learning. *Curr. Biol.* **20**, R639–R640. doi:10.1016/j.cub.2010.06.018
- Hoinville, T. and Wehner, R. (2018). Optimal multiguide integration in insect navigation. *Proc. Natl. Acad. Sci. USA* **115**, 2824–2829. doi:10.1073/pnas.1721668115
- Jayatilaka, P., Narendra, A., Reid, F. S., Cooper, P. and Zeil, J. (2011). Different effects of temperature on foraging activity schedules in sympatric *Myrmecia* ants. *J. Exp. Biol.* **214**, 2730–2738. doi:10.1242/jeb.053710
- Jayatilaka, P., Raderschall, A. C., Narendra, A. and Zeil, J. (2014). Individual foraging patterns of the jack jumper ant *Myrmecia croslandi* (Hymenoptera: Formicidae). *Myrmecol. News* **19**, 75–83. doi:10.1242/jeb.185306
- Jayatilaka, P., Murray, T., Narendra, A. and Zeil, J. (2018). The choreography of learning walks in the Australian jack jumper ant *Myrmecia croslandi*. *J. Exp. Biol.* **221**, jeb185306. doi:10.1242/jeb.185306
- Kodzhabashev, A. and Mangan, M. (2015). Route following without scanning. In *Biomimetic and Biohybrid Systems* (ed. S.P. Wilson, P.F.M.J. Verschure, A. Mura and T.J. Prescott), pp. 199–210. Lecture Notes in Artificial Intelligence 9222. Heidelberg, Berlin, New York: Springer Verlag.
- Kohler, M. and Wehner, R. (2005). Idiosyncratic route-based memories in desert ants, *Melophorus bagoti*: How do they interact with path-integration vectors? *Neurobiol. Learn. Memory* **83**, 1–12. doi:10.1016/j.nlm.2004.05.011
- Legge, E.L.G., Wystrach, A., Spetch, M.L. and Cheng, K. (2014). Combining sky and earth: desert ants (*Melophorus bagoti*) show weighted integration of celestial and terrestrial cues. *J. Exp. Biol.* **217**, 4159–4166. doi:10.1242/jeb.107862
- Lent, D.D., Graham, P. and Collett, T.S. (2013). Visual scene perception in navigating wood ants. *Curr. Biol.* **23**, 684–690. doi:10.1016/j.cub.2013.03.016

- Le Möel, F. and Wystrach, A. (2019). Opponent processes in visual memories: a model of attraction and repulsion in navigating insects' mushroom bodies. *bioRxiv*, 877449. doi:https://doi.org/10.1101/2019.12.16.877449
- Mangan, M. and Webb, B. (2012). Spontaneous formation of multiple routes in individual desert ants (*Cataglyphis velox*). *Behav. Ecol.* **23**, 944-954. doi:10.1093/beheco/ars051
- Möller, R. (2012). A model of ant navigation based on visual prediction. *J. Theo. Biol.* **305**, 118-130. doi:10.1016/j.jtbi.2012.04.022
- Müller, M. and Wehner, R. (2010). Path integration provides a scaffold for landmark learning in desert ants. *Curr. Biol.* **20**, 1368-1371. doi:10.1016/j.cub.2010.06.035
- Muser, B., Sommer, S., Wolf, H. and Wehner, R. (2005). Foraging ecology of the thermophilic Australian desert ant *Melophorus bagoti*. *Autr. J. Zool.* **53**, 301-311. doi:10.1071/ZO05023
- Namiki, S. and Kanzaki, R. (2016). The neurobiological basis of orientation in insects: insights from the silkworm mating dance. *Curr. Opin. Insect Sci.* **15**, 16-26. doi:10.1016/j.cois.2016.02.009
- Narendra, A., Gourmaud, S. and Zeil, J. (2013). Mapping the navigational knowledge of individually foraging ants *Myrmecia croslandi*. *Proc. R. Soc. Lond. B* **280**, 20130683. doi:10.1098/rspb.2013.0683
- Owald, D., Felsenberg, J., Talbot, C. B., Das, G., Perisse, E., Huetteroth, W. and Waddell, S. (2015). Activity of Defined Mushroom Body output neurons underlies learned olfactory behavior in *Drosophila*. *Neuron* **86**, 417-427. doi:10.1016/j.neuron.2015.03.025
- Philippides, A., Baddeley, B., Cheng, K. and Graham, P. (2011). How might ants use panoramic views for route navigation? *J. Exp. Biol.* **214**, 445-451. doi:10.1242/jeb.046755
- Reid, S.F., Narendra, A., Hemmi, J.M. and Zeil, J. (2011). Polarised skylight and the landmark panorama provide night active bull ants with compass information during route following. *J. Exp. Biol.* **214**, 363-370. doi:10.1242/jeb.049338
- Saumweber, T., Rohwedder, A., Schleyer, M., Eichler, K., Chen, Y.-C., Aso, Y., Cardona, A., Eschbach, C., Kobler, O., Voigt, A. et al. (2018). Functional architecture of reward learning in mushroom body extrinsic neurons of larval *Drosophila*. *Nature Comm.* **9**, 1104. doi:10.1038/s41467-018-03130-1
- Schultheiss, P., Cheng, K. and Reynold, A. M. (2015). Searching behavior in social Hymenoptera. *Learn. Motiv.* **50**, 59-67. doi:10.1016/j.lmot.2014.11.002
- Schwarz, S., Clement, L., Gkaniats, E. and Wystrach, A. (2019). How do backward walking ants (*Cataglyphis velox*) cope with navigational uncertainty? *bioRxiv* doi: https://doi.org/10.1101/2019.12.16.877704
- Schwarz, S., Wystrach, A. and Cheng, K. (2017a). Ants' navigation in an unfamiliar environment is influenced by their experience of a familiar route. *Sci. Rep.* **7**, 14161. doi:10.1038/s41598-017-14036-1
- Schwarz, S., Mangan, M., Zeil, J., Webb, B. and Wystrach, A. (2017b). How ants use vision when homing backward. *Curr. Biol.* **27**, 401-407. doi:10.1016/j.cub.2016.12.019
- Stürzl, W., Grix, I., Mair, E., Narendra, A. and Zeil, J. (2015). Three-dimensional models of natural environments and the mapping of navigational information. *J. Comp. Physiol. A* **201**, 563-584. doi:10.1007/s00359-015-1002-y
- Warren, W. H. (2019). Non-Euclidean navigation. *J. Exp. Biol.* **222**, jeb187971. doi:10.1242/jeb.187971
- Webb, B. and Wystrach, A. (2016). Neural mechanisms of insect navigation. *Curr Opin. Insect sci.* **15**, 27-39. doi:10.1016/j.cois.2016.02.011
- Wehner, R., Michel, B. and Antonsen, P. (1996). Visual navigation in insects: coupling of egocentric and geocentric information. *J. Exp. Biol.* **199**, 129-140.
- Wehner, R., Meier, C. and Zoliker, C. (2004). The ontogeny of foraging behaviour in desert ants, *Cataglyphis bicolor*. *Ecol. Entomol.* **29**, 240-250. doi:10.1111/j.0307-6946.2004.00591.x
- Wehner, R., Boyer, M., Loertscher, F., Sommer, S. and Menzi, U. (2006). Ant navigation: one-way routes rather than maps. *Curr. Biol.* **16**, 75-79. doi:10.1016/j.cub.2005.11.035
- Wehner, R., Hoinville, T., Cruse, H., and Cheng, K. (2016). Steering intermediate courses: desert ants combine information from various navigational routines. *J. Comp. Physiol. A* **202**, 459-472. doi:10.1007/s00359-016-1094-z. Epub 2016 Jun 3.
- Wystrach, A. and Graham, P. (2012). What can we learn from studies of insect navigation? *Anim. Behav.* **84**, 13-20. doi:10.1016/j.anbehav.2012.04.017
- Wystrach, A., Beugnon, G. and Cheng, K. (2011a). Landmarks or panoramas: what do navigating ants attend to for guidance? *Front. Zool.* **8**, 21. doi:10.1186/1742-9994-8-21
- Wystrach, A., Schwarz, S., Schultheiss, P., Beugnon, G. and Cheng, K. (2011b). Views, landmarks, and routes: how do desert ants negotiate an obstacle course? *J. Comp. Physiol. A* **197**, 167-179. doi:10.1007/s00359-010-0597-2
- Wystrach, A., Beugnon, G. and Cheng, K. (2012). Ants might use different view-matching strategies on and off the route. *J. Exp. Biol.* **215**, 44-55. doi:10.1242/jeb.059584
- Wystrach, A., Mangan, M., Philippides, A. and Graham, P. (2013a). Snapshots in ants? New interpretations of paradigmatic experiments. *J. Exp. Biol.* **216**, 1766-1770. doi:10.1242/jeb.082941
- Wystrach, A., Schwarz, S., Baniel, A. and Cheng, K. (2013b). Backtracking behaviour in lost ants: an additional strategy in their navigational toolkit. *Proc. Roy. Soc. B* **280**, 20131677. doi:10.1098/rspb.2013.1677
- Wystrach, A., Lagogiannis, K. and Webb, B. (2016). Continuous lateral oscillations as a core mechanism for taxis in *Drosophila* larvae. *Elife* **5**, e15504. doi:10.7554/eLife.15504
- Wystrach, A., Schwarz, S., Graham, P. and Cheng, K. (2019a). Running paths to nowhere: repetition of routes shows how navigating ants modulate online the weights accorded to cues. *Anim. Cogn.* **22**, 213-222. doi:10.1007/s10071-019-01236-7
- Wystrach, A., Buehlmann, C., Schwarz, S., Cheng, K. and Graham, P. (2019b). Avoiding pitfalls: trace conditioning and rapid aversive learning during route navigation in desert ants. *bioRxiv* 771204. doi:10.1101/771204
- Zeil, J. (2012). Visual homing: an insect perspective. *Curr. Opin. Neurobiol.* **22**, 85-93. doi:10.1016/j.conb.2011.12.008
- Zeil, J. and Fleischmann, P. (2019). The learning walks of ants (Formicidae, Hymenoptera). *Myrmecol. News* **29**, 93-110. doi:10.25849/myrmecol.news\_029:093
- Zeil, J., Hofmann, M. I. and Chahl, J. S. (2003). Catchment areas of panoramic snapshots in outdoor scenes. *J. Opt. Soc. Am. A* **20**, 450-469. doi:10.1364/JOSAA.20.000450
- Zeil, J., Narendra, A. and Stürzl, W. (2014). Looking and homing: how displaced ants decide where to go. *Phil. Trans. Roy. Soc. B* **369**, 20130034. doi:10.1098/rstb.2013.0034
